# Supplementary material for: Lymph node migratory dendritic cells modulate HIV-1 transcription through PD-1 engagement
Source: PubMed Central journal article supplement (PMC6675123; doi:10.1371/journal.ppat.1007918), 2019-07-22

# Supplemental Figure 2

## Blood

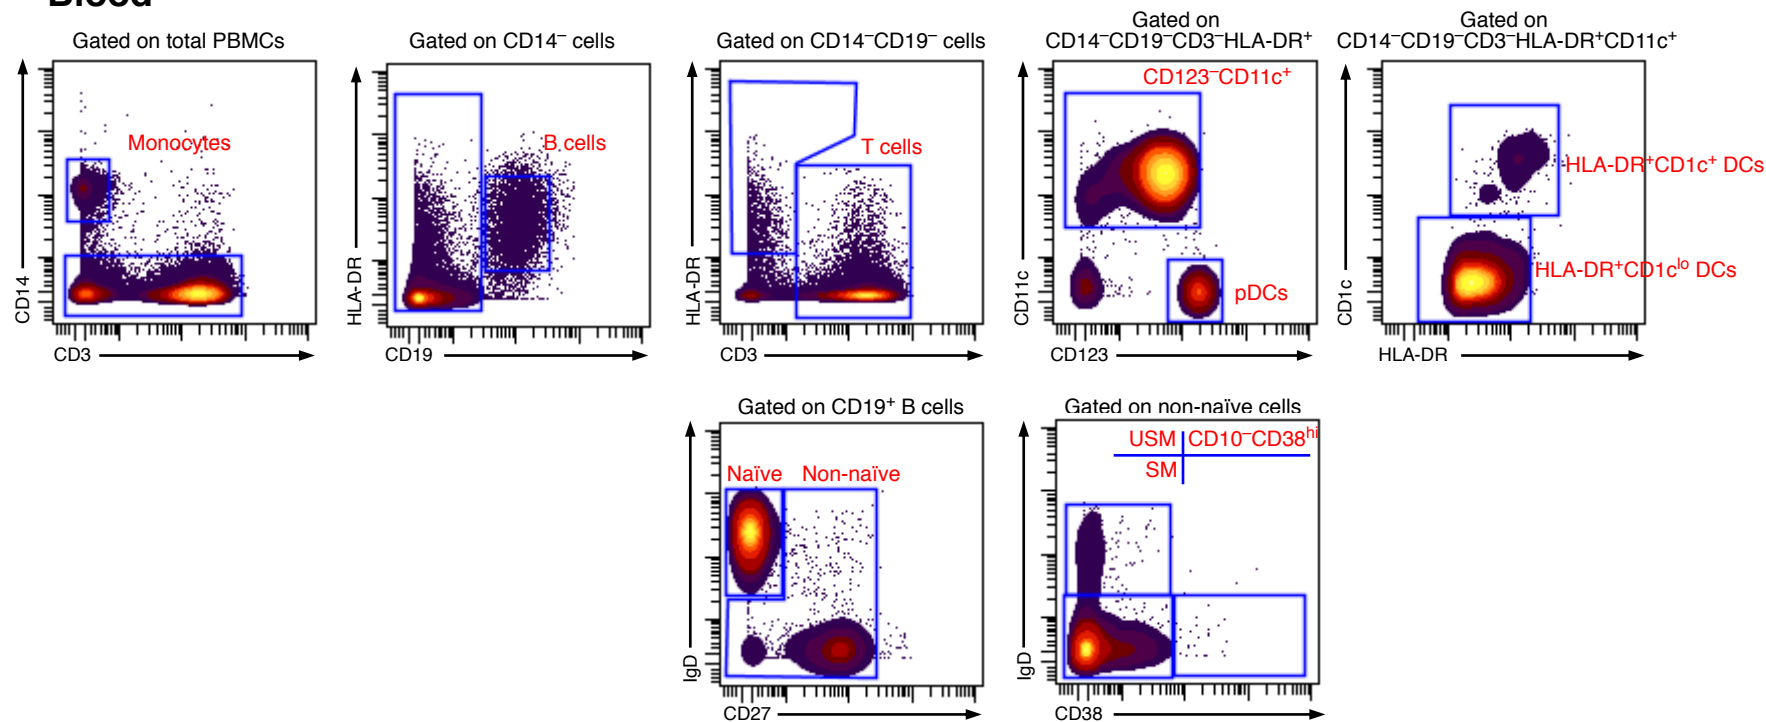

## LN

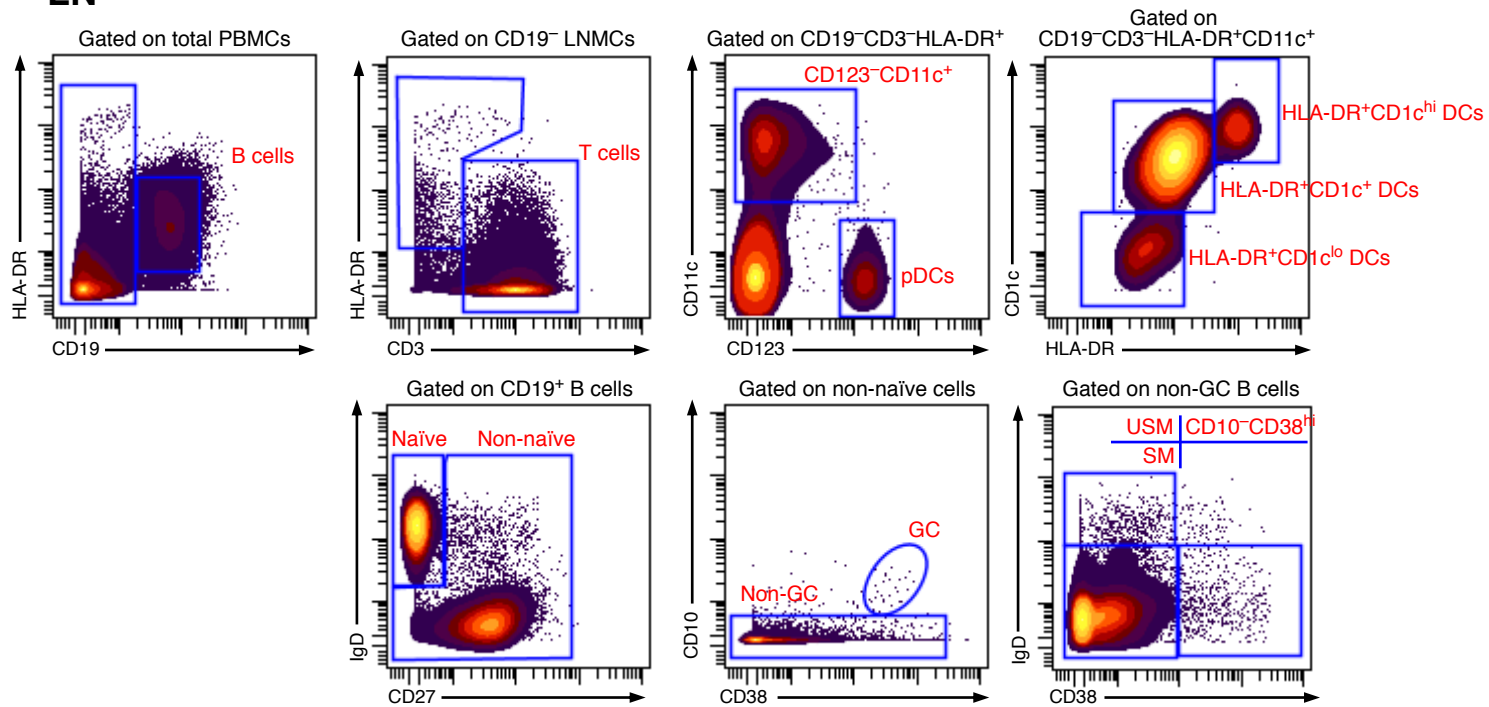

Supplement: ppat.1007918.s002.pdf [file ppat.1007918.s002.pdf]
