# Supplementary material for: Lymph node migratory dendritic cells modulate HIV-1 transcription through PD-1 engagement
Source: PubMed Central journal article supplement (PMC6675123; doi:10.1371/journal.ppat.1007918), 2019-07-22

# Supplemental Figure 3

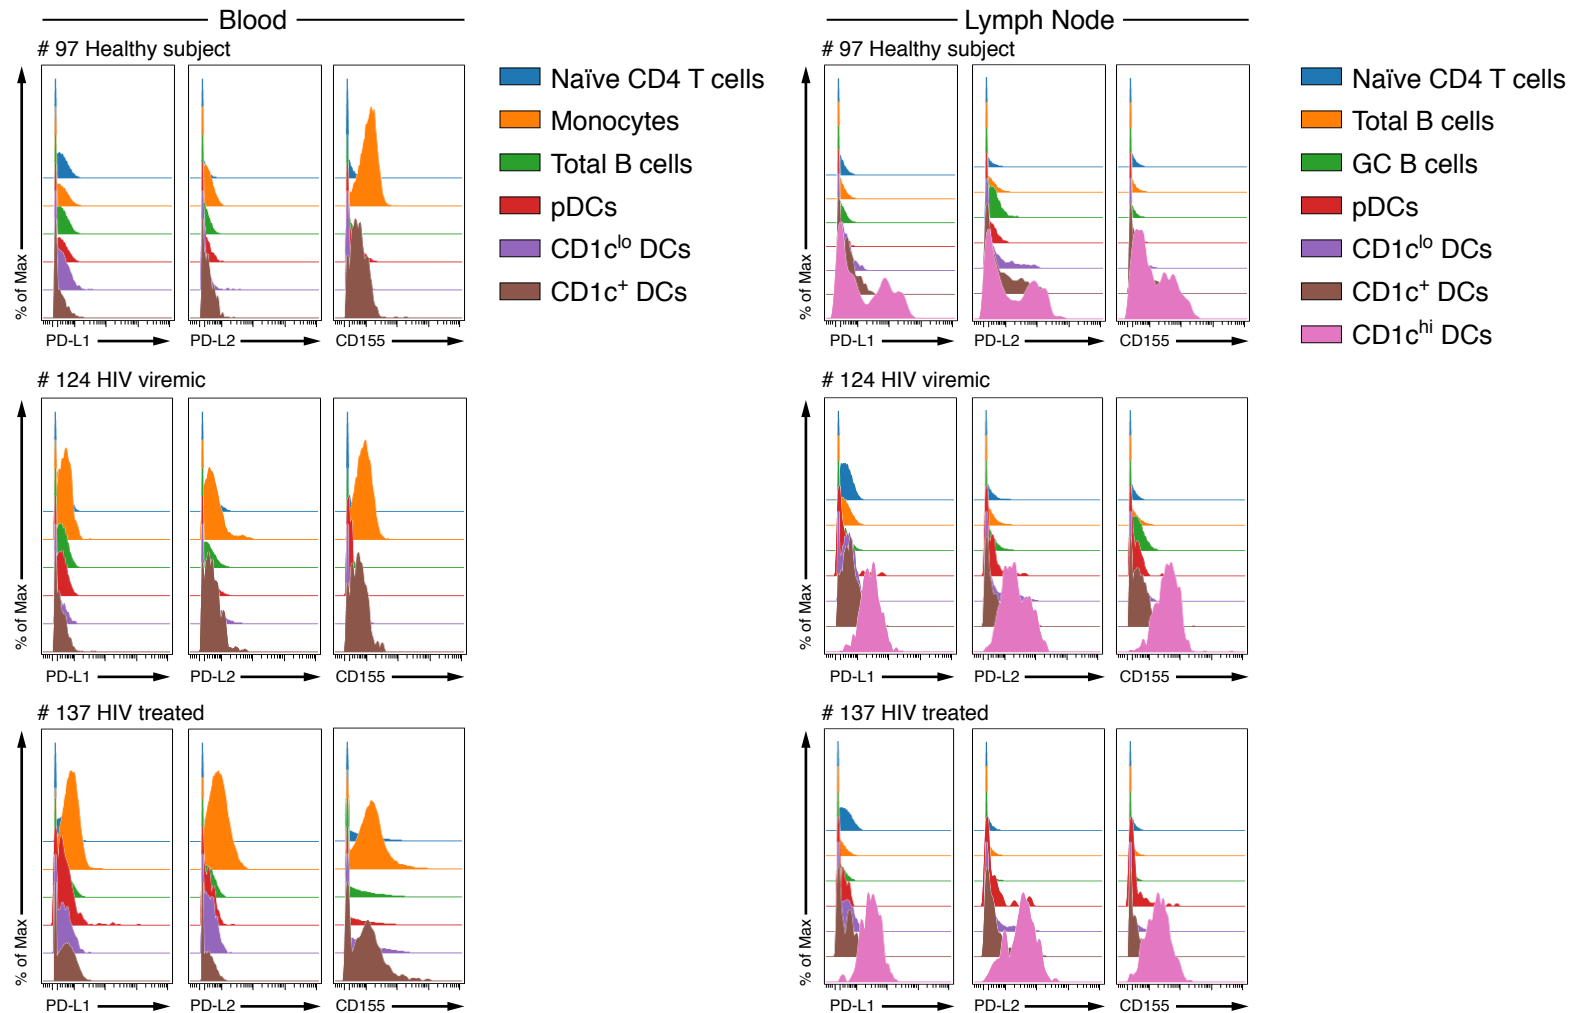

# Supplemental Figure 6

**A**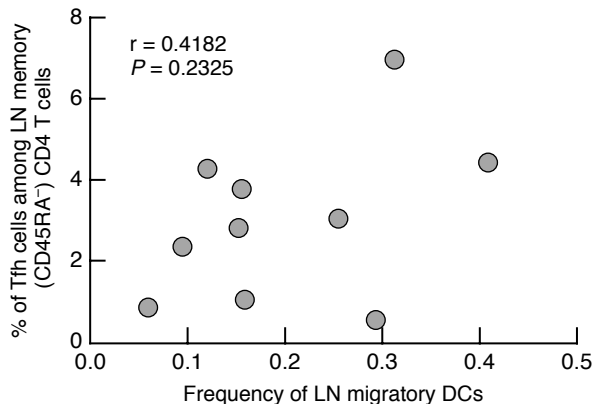**B**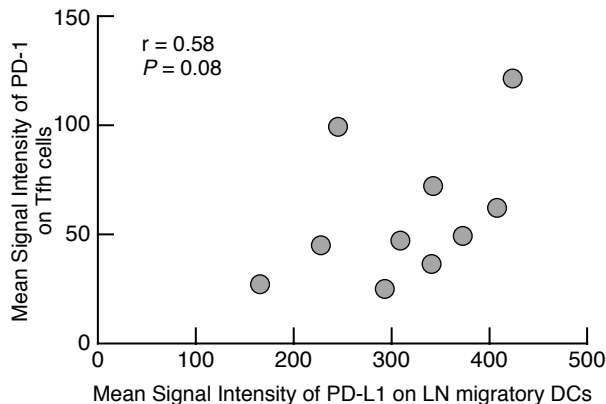**C**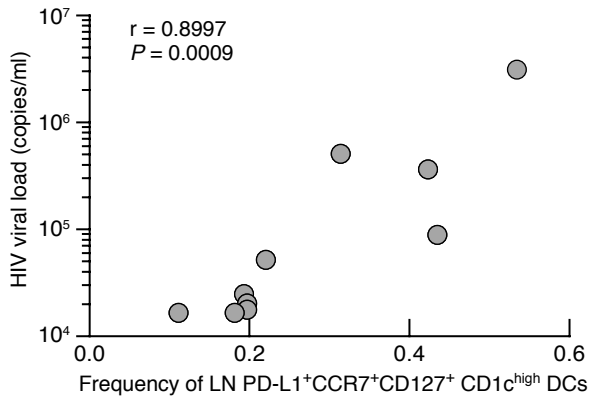**D**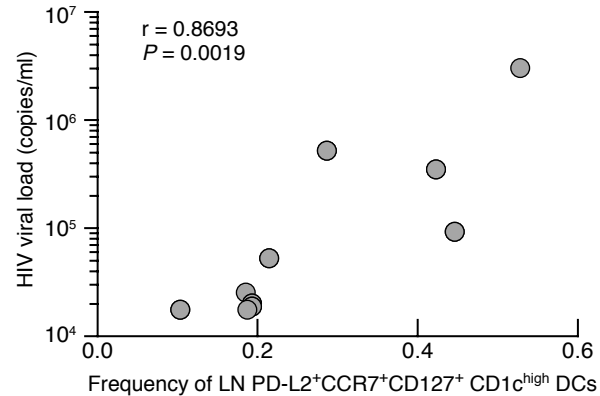

Supplement: ppat.1007918.s003.pdf [file ppat.1007918.s003.pdf]
