# Supplementary material for: Lymph node migratory dendritic cells modulate HIV-1 transcription through PD-1 engagement
Source: PubMed Central journal article supplement (PMC6675123; doi:10.1371/journal.ppat.1007918), 2019-07-22

# Supplemental Figure 4

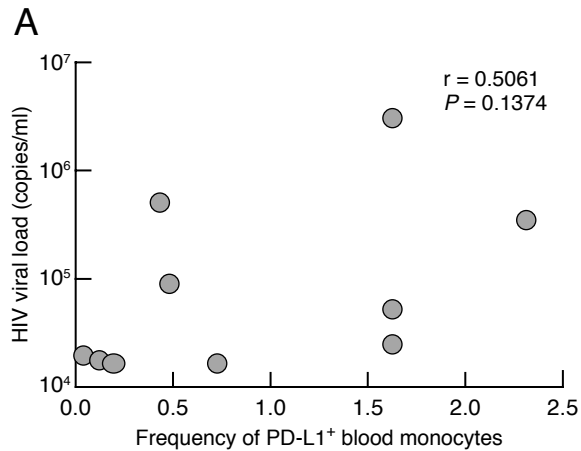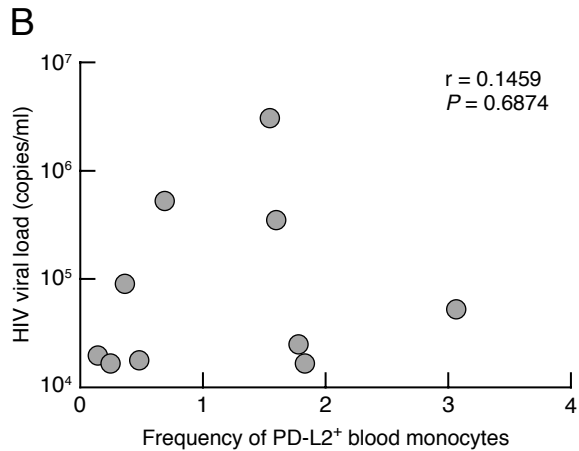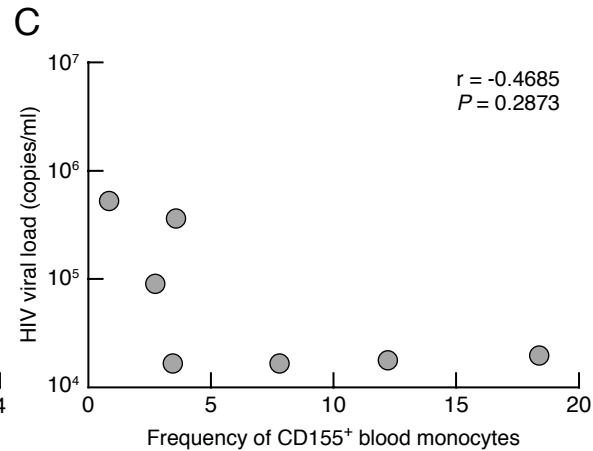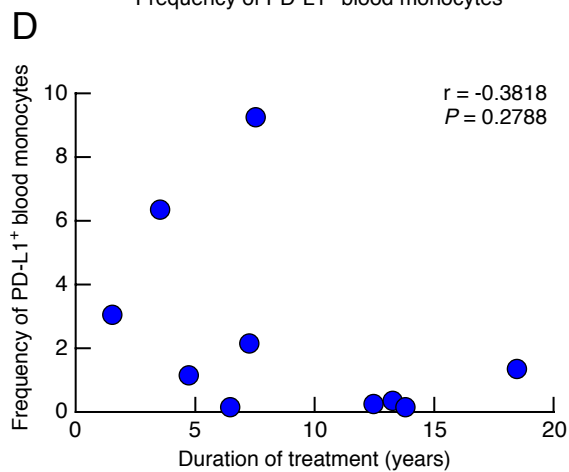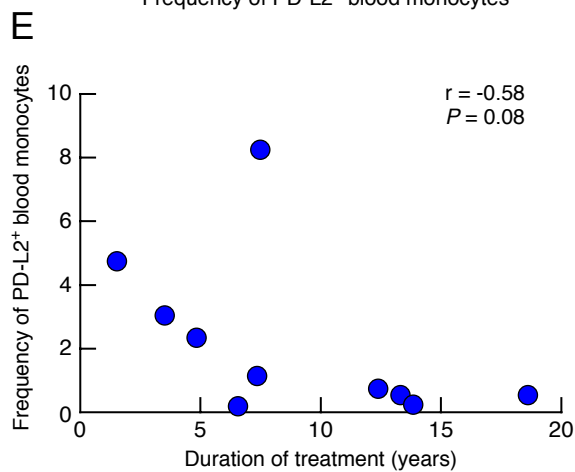

Supplement: ppat.1007918.s004.pdf [file ppat.1007918.s004.pdf]
