# Supplementary material for: Lymph node migratory dendritic cells modulate HIV-1 transcription through PD-1 engagement
Source: PubMed Central journal article supplement (PMC6675123; doi:10.1371/journal.ppat.1007918), 2019-07-22
Supplement: ppat.1007918.s005.pdf [file ppat.1007918.s005.pdf]

# Supplemental Figure 5

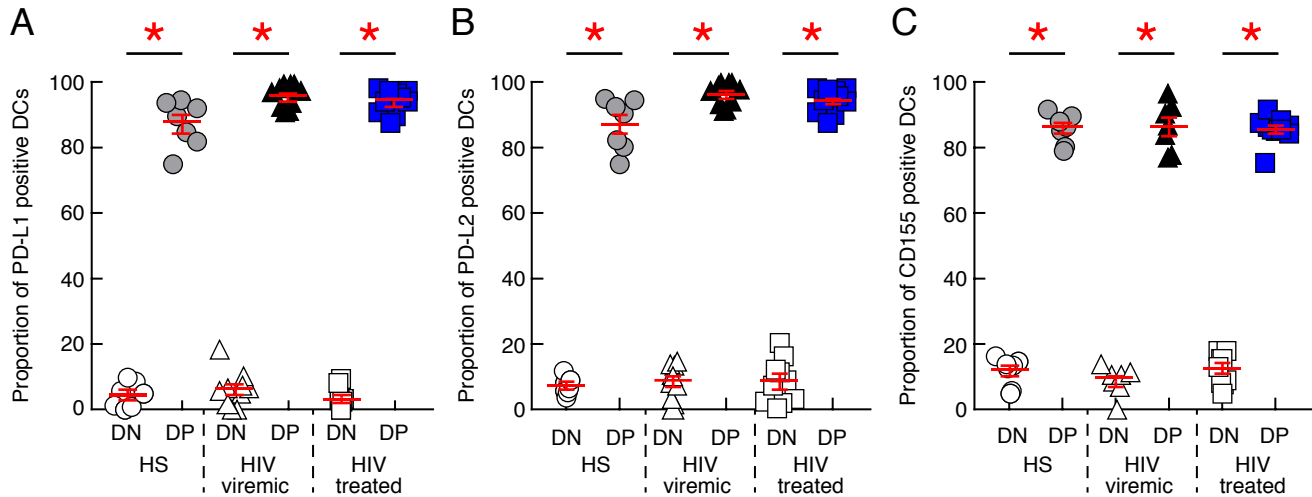

**DN:** HLA-DR<sup>+</sup>CD1c<sup>hi</sup>CCR7<sup>-</sup>CD127<sup>-</sup> LN DCs

**DP:** HLA-DR<sup>+</sup>CD1c<sup>hi</sup>CCR7<sup>+</sup>CD127<sup>+</sup> LN DCs
